# Supplementary material
Source: PubMed Central journal article supplement (PMC2788823)
Supplement: NIHMS160164-supplement-Supp_Table_1.pdf [file NIHMS160164-supplement-Supp_Table_1.pdf]

| Protein                                                                                           | Number of times detected (out of 4) | UniProt accession number | Peptides                                                                                                                                                                                                                                                                                                                                                                                                                                                                                                                                                                                                                                                                                                                                                                                                                                                                                                                                     |
|---------------------------------------------------------------------------------------------------|-------------------------------------|--------------------------|----------------------------------------------------------------------------------------------------------------------------------------------------------------------------------------------------------------------------------------------------------------------------------------------------------------------------------------------------------------------------------------------------------------------------------------------------------------------------------------------------------------------------------------------------------------------------------------------------------------------------------------------------------------------------------------------------------------------------------------------------------------------------------------------------------------------------------------------------------------------------------------------------------------------------------------------|
| AKAP350<br>(A-kinase anchor protein 9)<br>[Homo sapiens]                                          | 2                                   | Q99996                   | K.LSSLQDLEK.T<br>K.VTEEGTELSQR.L<br>K.VTQTELMR.E<br>R.EQSEKPSQELLEYNIQK.Q<br>R.ILYONLNEPTTWLSDR.T<br>R.IVELLNETEKYK.L<br>R.IVELLNETEKYKLDLSQTR.Q<br>R.LQFETADDEDFIWWQENIDEIILQKQ.L<br>R.LQGIMQEFQK.Q<br>R.QLEDLVEELSFQR.E<br>R.TNIQNLNQLREDELGSDISALTR.I<br>R.VTYGTEGLQQLQEFEEAIIK.Q                                                                                                                                                                                                                                                                                                                                                                                                                                                                                                                                                                                                                                                         |
| PRKAR2A protein (cAMP-dependent protein kinase type II-alfa regulatory subunit)<br>[Homo sapiens] | 3                                   | Q9BUB1                   | K.ADEHVIDQDGDGDNFYVIER.G<br>K.IVDVIGEK.I<br>K.MFESFIESVPLLK.S<br>K.NLDQEQLSQVLDAMFER.I<br>K.SNKDGGNQEVEIAR.C<br>R.AASAYAVGDVK.C<br>R.APASVLPAAATPR.Q<br>R.GTYDILVTK.D<br>R.QQPPDLVEFAVEYFTR.L                                                                                                                                                                                                                                                                                                                                                                                                                                                                                                                                                                                                                                                                                                                                                |
| cAMP-dependent protein kinase type II-beta regulatory subunit [Homo sapiens]                      | 2                                   | P31323                   | R.GSFGELALM#YNTPR.A<br>R.LQEAC#KDILLFK.N                                                                                                                                                                                                                                                                                                                                                                                                                                                                                                                                                                                                                                                                                                                                                                                                                                                                                                     |
| Cell-cycle and apoptosis regulatory protein 1<br>[Homo sapiens]                                   | 4                                   | Q6X935                   | K.AGLLOPPVR.I<br>K.DLSQLQENLK.I<br>K.DVEENVGLIVYNGAMVDVGSLLQK.L<br>K.EADGEQDEEEKDDGEAK.E<br>K.FSLDCPSCDMMELR.R<br>K.GKDEAMAIGGHWSPLDGPDPKDPVLIK.T<br>K.KDLSQLQENLK.I<br>K.LHDTFGFVDEDVFFQLSAVK.G<br>K.LQLLEEKTEDEKTIENLENSK.S<br>K.LQLLEEKTEDEKTIENLENSK.S<br>K.LTDTSKDEENHEESESLEQEDMLGNR.L<br>K.NMAILDPPADHLYSAK.V<br>K.QESKDVEENVGLIVYNGAMVDVGSLLQK.L<br>K.QESKDVEENVGLIVYNGAMVDVGSLLQK.L<br>K.QLKVEEQKEEQKELEK.S<br>K.SC*ALAEDPQELRDGFQHPAR.L<br>K.SLLSLPEKEDKKEK.D<br>K.TDEDEKTIENLENSK.S<br>K.TIENLENSK.S<br>K.TQMITINR.D<br>K.VEEQKEEQKELEK.S<br>K.VMLMASPSPMEDLYHK.S<br>L.AAAGLTTQTPANY.Q<br>R.DGFQHPAR.L<br>R.EVKKDLSQLQENLK.I<br>R.GYKQQLVEK.L<br>R.GYKQQLVEK.L<br>R.IQTLPNQNSQTQPLLK.T<br>R.IVSQPQPAR.R<br>R.KEADGEQDEEEKDDGEAK.E<br>R.KLDTSKDEENHEESESLEQEDMLGNR.L<br>R.LLLPTPTVK.Q<br>R.NDRGDQVQPNR.K<br>R.RYILPDEPAIIVHPNWAAS.S<br>R.SEWETLSR.G<br>R.VFTGVVTK.L<br>R.VLVEATYNPNMPFK.W<br>R.YILPDEPAIIVHPNWAAS.S<br>R.YTVQFSK.F |
| Cytoplasmic activation/proliferation-associated protein 1 [Homo sapiens]                          | 3                                   | Q6IMN7                   | K.SSGPPPPSGSSGSEAAAGAGAAAPASQHPATGTGAVQTEAMK.Q<br>K.YQYVNNLEFAK.E<br>R.DGYQQNFK.R<br>R.LNQDQLDAVSKYQEVNNEFAK.E<br>R.SFMALSDIQK.T<br>R.TDLKQGLNGVPISEELSLDEFYK.L<br>R.LNEQYEHASHIHLWDLLEGK.E                                                                                                                                                                                                                                                                                                                                                                                                                                                                                                                                                                                                                                                                                                                                                  |
| G3BP [Homo sapiens]                                                                               | 1                                   | Q6FI03                   | K.LPNFGFVFDSEPVGK.V<br>K.SSS@PAPADIAQTVQEDLR.T<br>K.SSSPAPADIAQTVQEDLR.T<br>R.FMQTFVLAPEGSVANK.F<br>R.YQDEVFGGFVTEPQEESEEEVEEPEER.Q                                                                                                                                                                                                                                                                                                                                                                                                                                                                                                                                                                                                                                                                                                                                                                                                          |
